# Supplementary material for: Fabrication of PES/PVP Water Filtration Membranes Using Cyrene®, a Safer Bio-Based Polar Aprotic Solvent
Source: Hindawi journal article supplement (doi:10.1155/2019/9692859), 2019-07-07
Supplement: f1 [file 9692859.f1.docx]

Supplementary Material

Fabrication of PES/PVP water filtration membranes using Cyrene®, a safer bio-based polar aprotic solvent

*Roxana A. Milescu a, C. Robert McElroy a, Thomas J. Farmer a, Paul M. Williams b,Matthew J. Walters b, James H. Clark a**

a Green Chemistry Centre of Excellence, Department of Chemistry, University of York, Heslington, York, YO10 5DD

b Department Chemical Engineering, Swansea University, Sketty, Swansea, SA2 8PP

***** Corresponding author: [james.clark@york.ac.uk](mailto:james.clark@york.ac.uk)

Content *Page*

**SM Table 1:** The full list of solvents used in HSPiP *SM2*

**SM Fig. 1.** The viscosity of a casting gel of PES/C10 from RT to 110 °C SM3

**SM Fig. 2.** Pore diameters of PES/C membranes SM3

**SM Fig. 3.** Pore diameter of PES/N membranes SM4

**SM Fig. 4.** Coagulation bath of PES/PVP membranes in Cyrene (left) and NMP (right) after membrane casting SM4

**SM Fig. 5.** SEM cross-section of membranes produced from NMP and different concentrations of PVP: 0% (a, d), 0.1% (b, e), 0.5% (c, f), 1% (g, j), 5% (h, k) and 10% (i, l) in cold (first letter) and hot gels (second letter) SM5

**SM Fig. 6.** PES/C1 at different thickness (500um on the left and 250um on the right) SM6

**SM Table 1:** The full list of solvents used in HSPiP

| **Solvent** | **δD** | **δP** | **δH** | **Score** | **RED** |
| --- | --- | --- | --- | --- | --- |
| Cyrene | 18.9 | 12.4 | 7.1 | 1 | 0.468 |
| N-Methyl-2-Pyrrolidone (NMP) | 18 | 12.3 | 7.2 | 1 | 0.64 |
| N,N-Dimethyl Acetamide | 16.8 | 11.5 | 9.4 | 1 | 0.934 |
| Dimethyl Sulfate | 16.5 | 13 | 7 | 5 | 0.993 |
| Dimethyl Sulfoxide (DMSO) | 18.4 | 16.4 | 10.2 | 1 | 0.998 |
| Tetrahydrofuran (THF) | 16.8 | 5.7 | 8 | 5 | 0.998 |
| Propylene Carbonate | 20 | 18 | 4.1 | 4 | 1.002 |
| Dimethyl Formamide (DMF) | 17.4 | 13.7 | 11.3 | 1 | 1.008 |
| Chloroform | 17.8 | 3.1 | 5.7 | 4 | 1.013 |
| 1,1-Dichloroethane | 16.5 | 7.8 | 3 | 1 | 1.041 |
| Benzyl Alcohol | 18.4 | 6.3 | 13.7 | 4 | 1.054 |
| Sulfolane (Tetramethylene Sulfone) | 17.8 | 17.4 | 8.7 | 5 | 1.106 |
| 2-Methylfuran | 17.3 | 2.8 | 7.4 | 5 | 1.115 |
| Acetone | 15.5 | 10.4 | 7 | 4 | 1.159 |
| Ethyl Acetate | 15.8 | 5.3 | 7.2 | 5 | 1.215 |
| Dimethyl Carbonate | 15.5 | 8.6 | 9.7 | 5 | 1.224 |
| Tmthf | 15.5 | 8.6 | 9.7 | 5 | 1.224 |
| Toluene | 18 | 1.4 | 2 | 5 | 1.268 |
| p-Xylene | 17.8 | 1 | 3.1 | 5 | 1.279 |
| n-Propyl Acetate | 15.3 | 4.3 | 7.6 | 5 | 1.377 |
| Acetonitrile | 15.3 | 18 | 6.1 | 5 | 1.537 |
| 1-Butanol | 16 | 5.7 | 15.8 | 5 | 1.583 |
| Propionic Acid | 14.7 | 5.3 | 12.4 | 5 | 1.604 |
| Cyclohexane | 16.8 | 0 | 0.2 | 5 | 1.623 |
| Diethyl Ether | 14.5 | 2.9 | 4.6 | 5 | 1.633 |
| 2-Propanol | 15.8 | 6.1 | 16.4 | 5 | 1.65 |
| 1-Propanol | 16 | 6.8 | 17.4 | 5 | 1.685 |
| Heptane | 15.3 | 0 | 0 | 5 | 1.843 |
| Ethanol | 15.8 | 8.8 | 19.4 | 5 | 1.866 |
| Hexane | 14.9 | 0 | 0 | 5 | 1.906 |
| Methanol | 14.7 | 12.3 | 22.3 | 5 | 2.307 |
| Water | 15.5 | 16 | 42.3 | 5 | 4.421 |


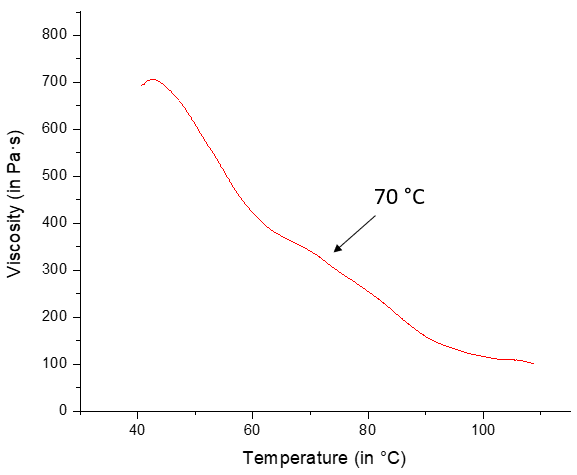


**SM Fig. 1.** The viscosity of a casting gel of PES/C10 from RT to 110 °C


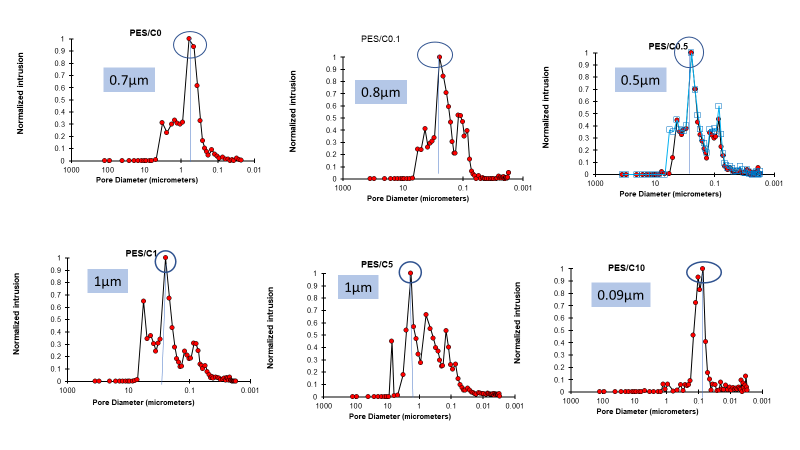


**SM Fig. 2.** Pore diameters of PES/C membranes


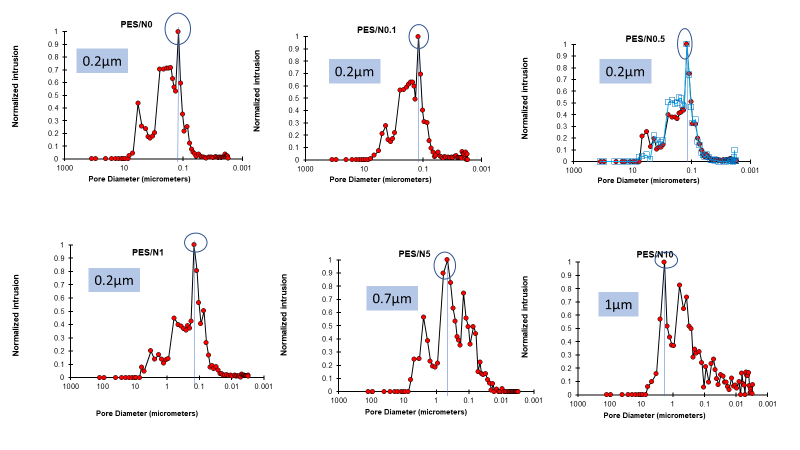


**SM Fig. 3.** Pore diameter of PES/N membranes


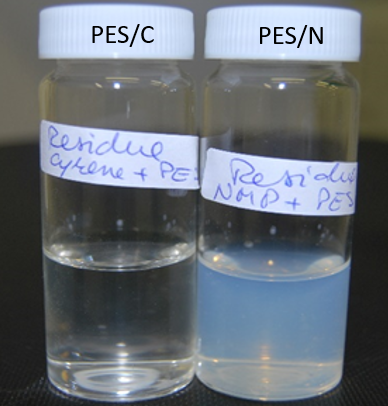


**SM Fig. 4.** Coagulation bath of PES/PVP membranes in Cyrene (left) and NMP (right) after membrane casting


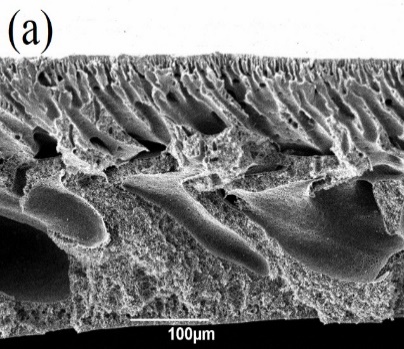

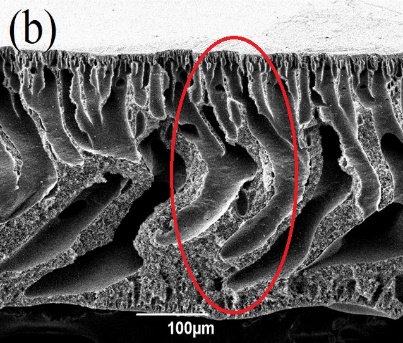

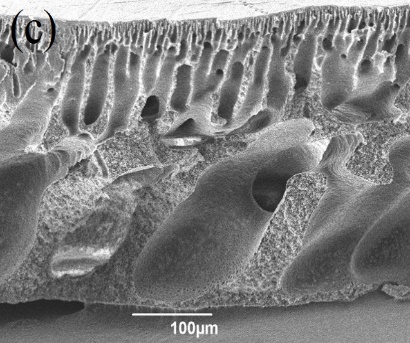

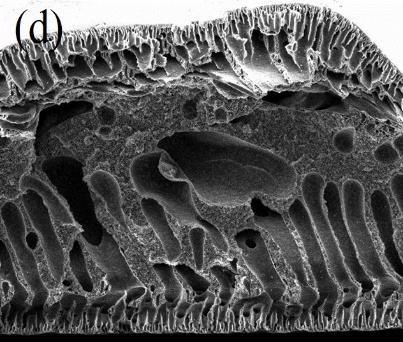

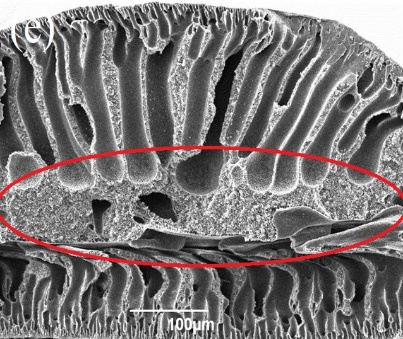

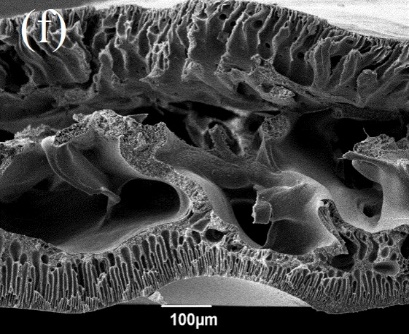

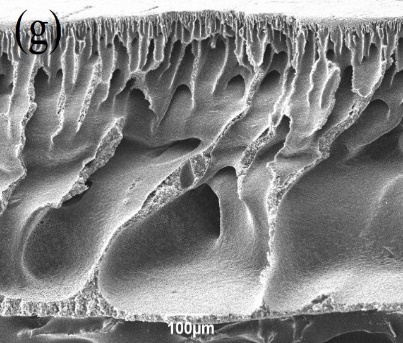

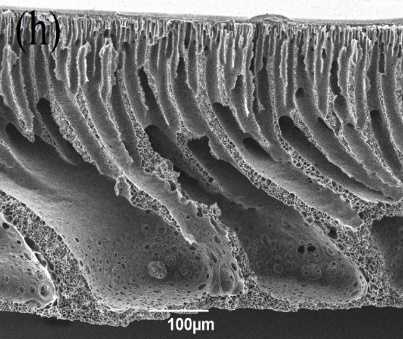

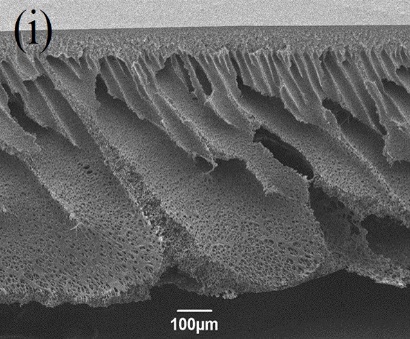

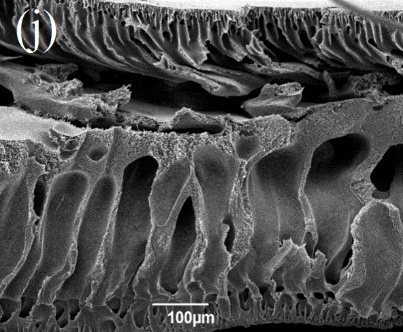

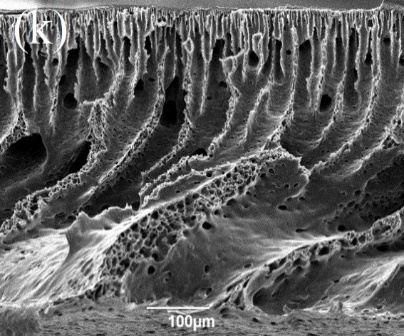

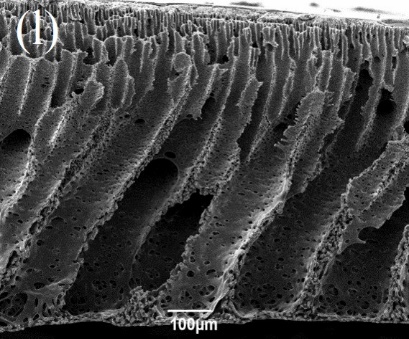


**SM Fig. 5.** SEM cross-section of membranes produced from NMP and different concentrations of PVP: 0% (a, d), 0.1% (b, e), 0.5% (c, f), 1% (g, j), 5% (h, k) and 10% (i, l) in cold (first letter) and hot gels (second letter)


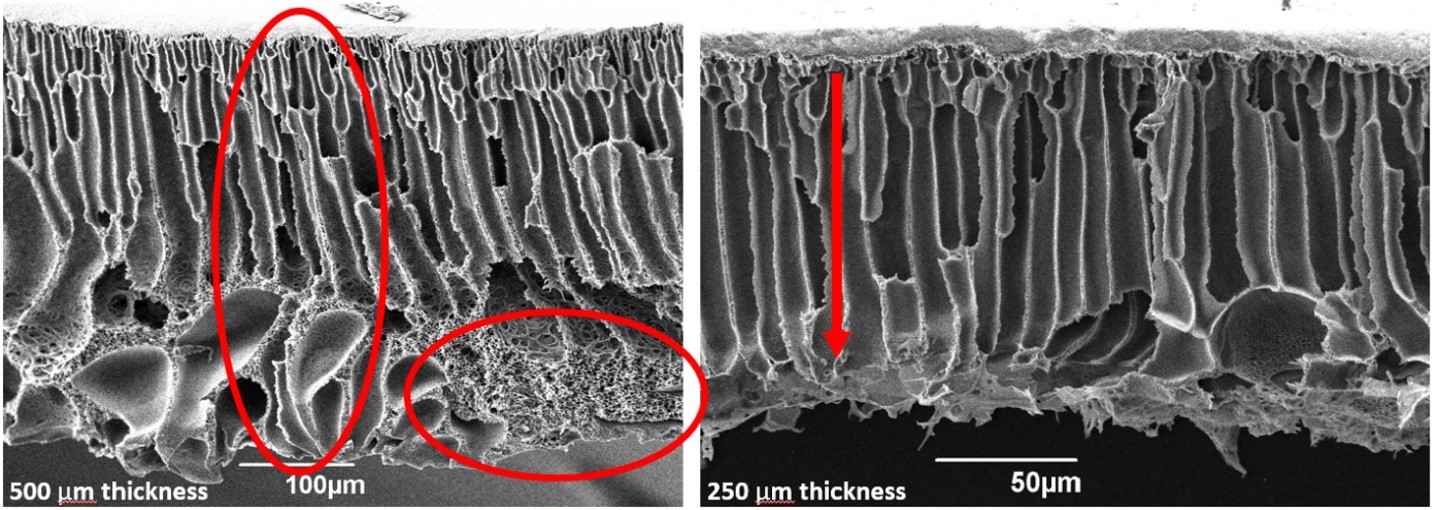


**SM Fig. 6.** PES/C1 at different thickness (500um on the left and 250um on the right)
